# Supplementary material for: A water vapor modulated aerosol impact on ice crystal size
Source: Copernicus journal article supplement (doi:10.5194/acp-2017-548), 2017-07-26
Supplement: Supplementary file [file manuscript_acp_SI_20171107_mark.pdf › response to reviewer 1/manuscript_acp_SI_20171107_mark.pdf]

**Supplementary Information for**

**Impact of aerosols on ice crystal size**

**Bin Zhao<sup>1</sup>, Kuo-Nan Liou<sup>1</sup>, Yu Gu<sup>1</sup>, Jonathan H. Jiang<sup>2</sup>, Qinbin Li<sup>1</sup>, Rong Fu<sup>1</sup>, Lei Huang<sup>1,2</sup>, Xiaohong Liu<sup>3</sup>, Xiangjun Shi<sup>3</sup>, Hui Su<sup>2</sup>, and Cenlin He<sup>1</sup>**

[1] Joint Institute for Regional Earth System Science and Engineering and Department of Atmospheric and Oceanic Sciences, University of California, Los Angeles, California 90095, USA.

[2] Jet propulsion Laboratory, California Institute of Technology, Pasadena, California 91109, USA.

[3] Department of Atmospheric Science, University of Wyoming, Laramie, Wyoming 82071, USA.

Correspondence to: Bin Zhao (zhaob1206@ucla.edu) and Yu Gu (gu@atmos.ucla.edu)

1   **Figures and Tables**

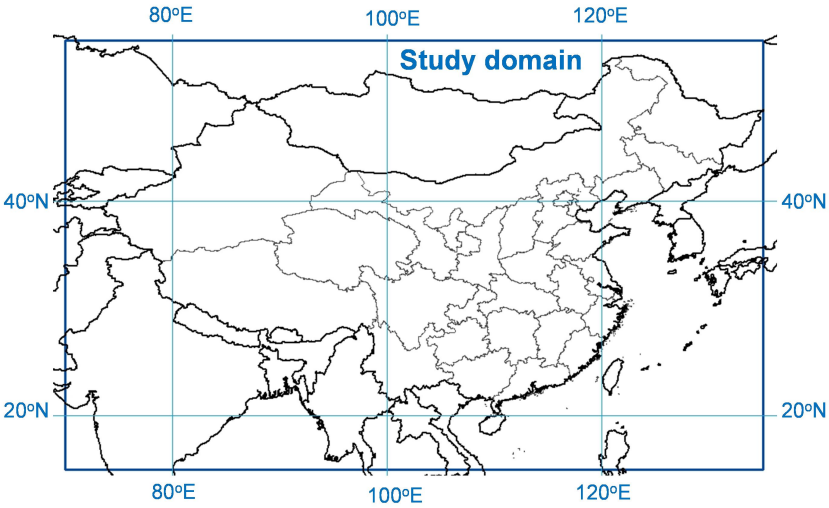

2  
3   Figure S1. The spatial domain of this study: 15°-55° N, 70°-135° E.

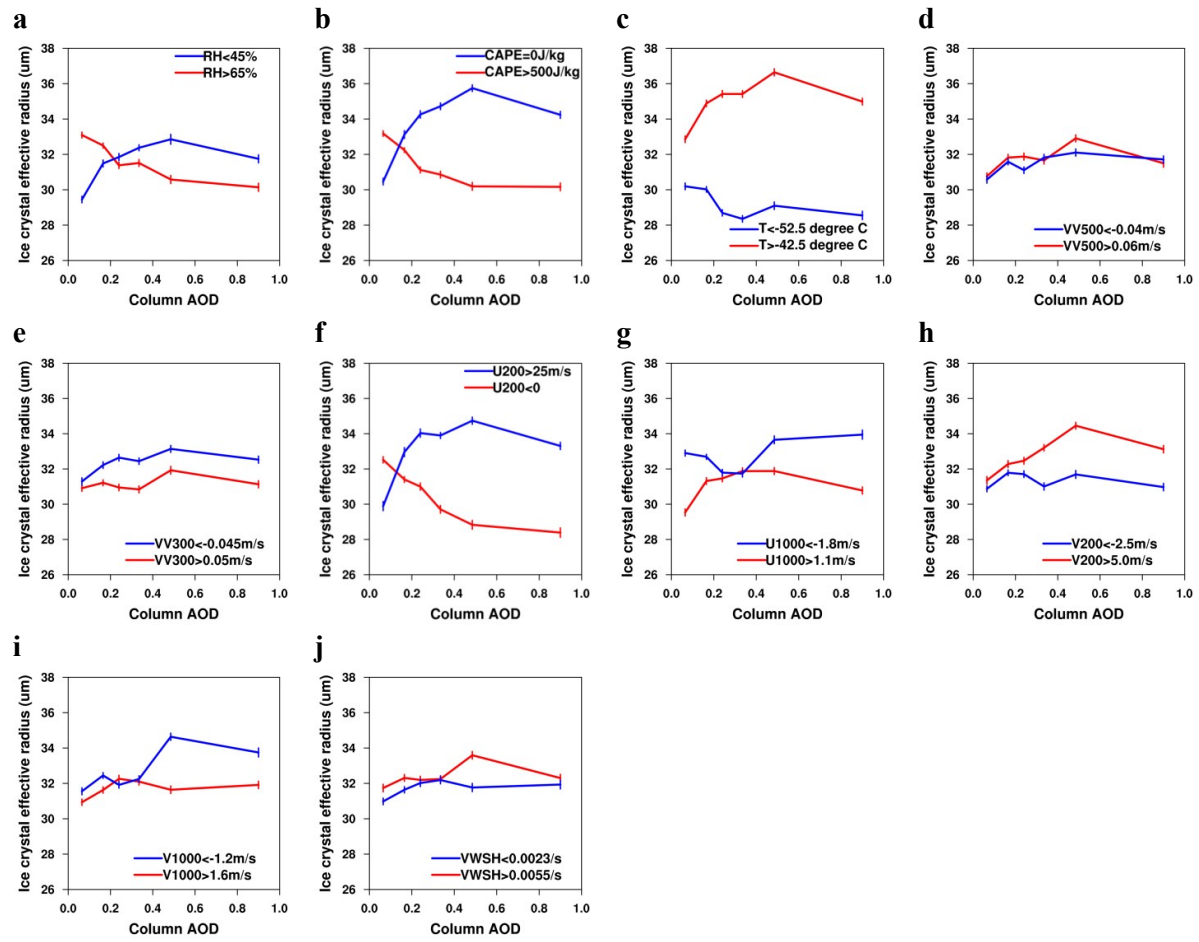

1 Figure S2. Changes in  $R_{ci}$  as a function of AOD for different ranges of (a) relative humidity  
 2 averaged between 100 hPa and 440 hPa ( $RH_{100-440hPa}$ ), (b) the convective available potential  
 3 energy (CAPE), (c) the middle cloud layer temperature ( $T_{mid}$ ), (d) the vertical velocity at 500  
 4 hPa (VV500), (e) the vertical velocity at 300 hPa (VV300), (f) the U-components of wind  
 5 speed at 200 hPa (U200), (g) the U-components of wind speed at 1000 hPa (U1000), (h) the  
 6 V-components of wind speed at 200 hPa (V200), (i) the V-components of wind speed at 1000  
 7 hPa (V1000), (j) and the vertical wind shear (VWSH) at potential vorticity surface of  $2 \times 10^{-6}$   
 8  $\text{deg K m}^2 \text{kg}^{-1} \text{s}^{-1}$ . The meteorological parameters are divided into 3 ranges containing similar  
 9 numbers of data points, and the curves for the medium meteorological range are not shown.  
 10 The definition of error bars is the same as in Fig. 1 in the main text. The total number of  
 11 samples used in this figure is  $5.68 \times 10^4$ .

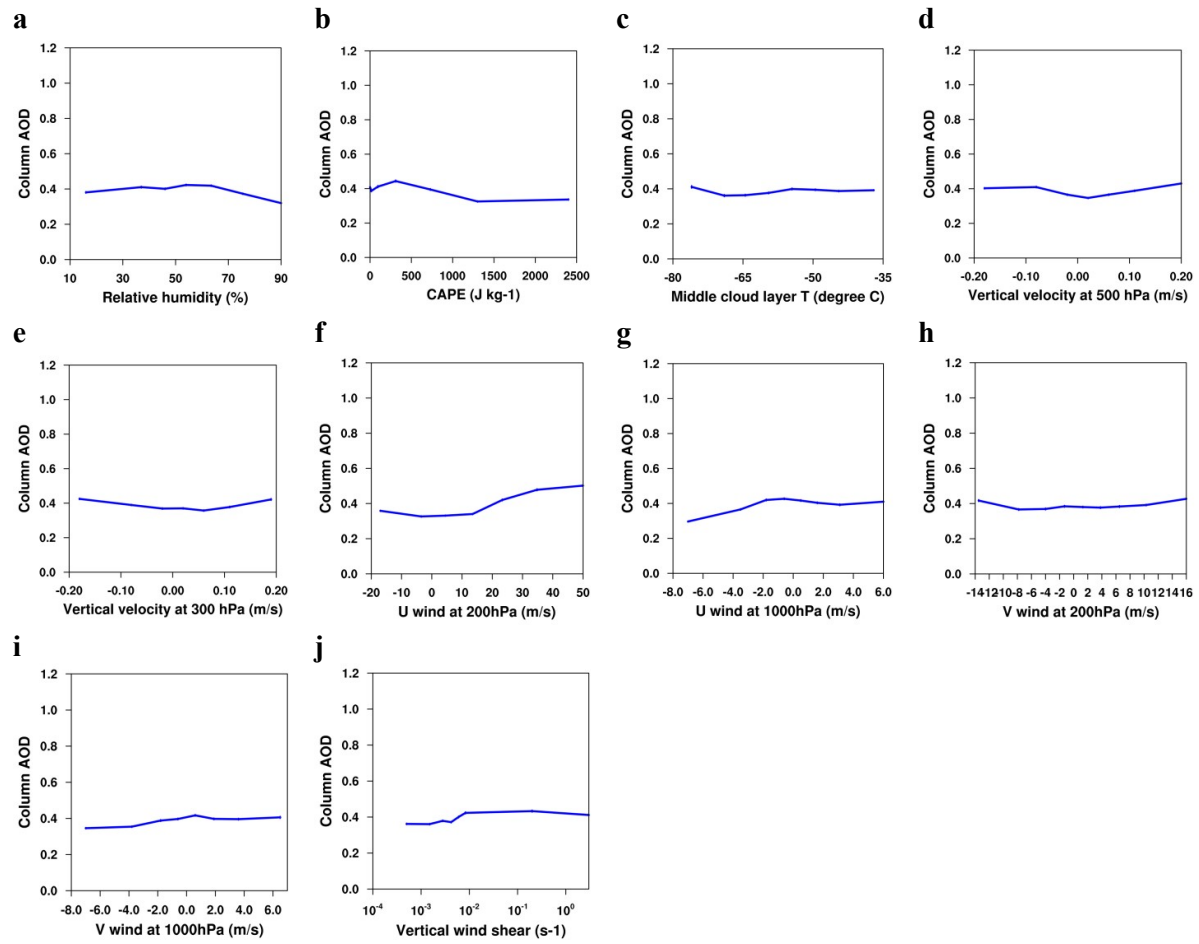

1 Figure S3. Changes in AOD as a function of meteorological parameters: (a)  $RH_{100-440hPa}$ , (b)  
 2 CAPE, (c)  $T_{mid}$ , (d) VV500, (e) VV300, (f) U200, (g) U1000, (h) V200, (i) V1000, and (j)  
 3 VWSH at the potential vorticity surface of  $2 \times 10^{-6} \text{ deg K m}^2 \text{ kg}^{-1} \text{ s}^{-1}$ . The definition of error  
 4 bars is the same as in Fig. 1 in the main text. Note that the error bars in some panels are very  
 5 small and hence not visible. The total number of samples used in this figure is  $5.68 \times 10^4$ .

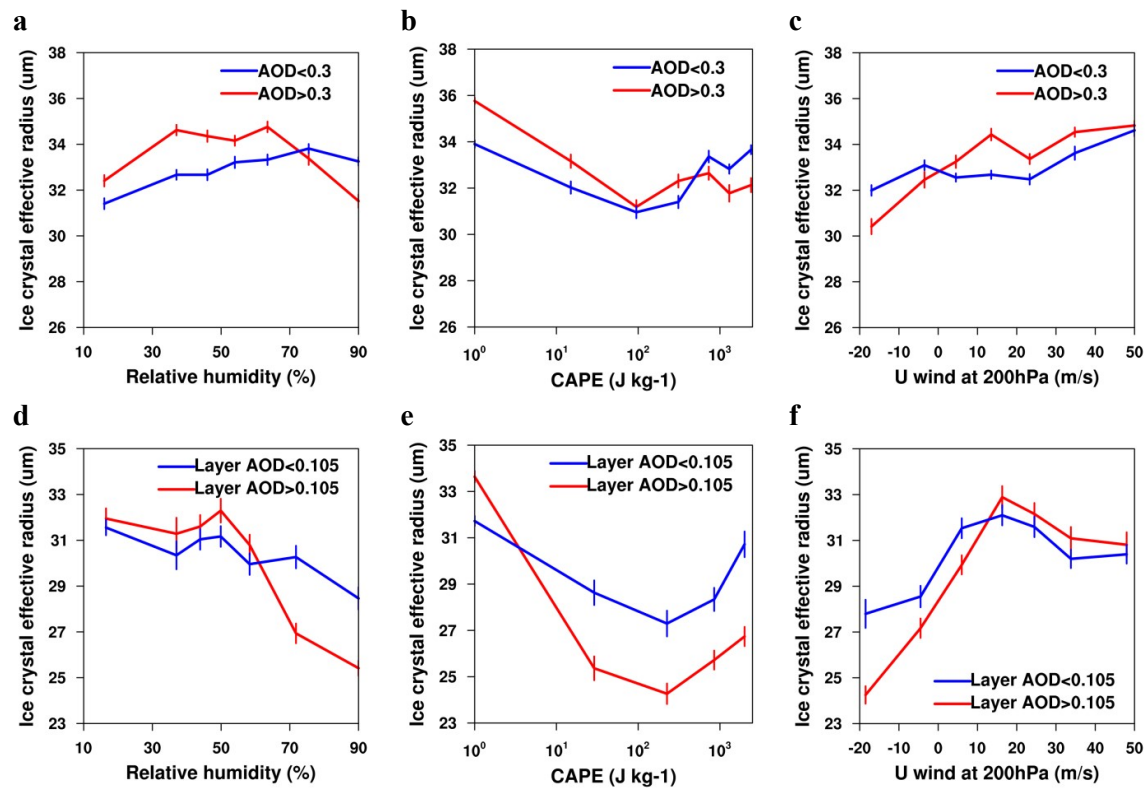

Figure S4. Changes in  $R_{ci}$  with meteorological parameters for different ranges of aerosol loading. (a-c) Changes in  $R_{ci}$  of convection-generated ice clouds with (a)  $RH_{100-440hPa}$ , (b) CAPE, and (c) U200 for different ranges of AOD. (d-f) Changes in  $R_{ci}$  of in-situ ice clouds with (d)  $RH_{100-440hPa}$ , (e) CAPE, and (f) U200 for different ranges of layer AOD. All samples are divided into two AOD ranges containing similar sample numbers. The definition of error bars is the same as in Fig. 1. The total numbers of samples used for convection-generated and in-situ ice clouds are  $2.73 \times 10^4$  and  $1.09 \times 10^4$ , respectively.

1 Table S1. Datasets used in this study.

| Satellite/<br>Sensor | Product                          | Variable                                                                                                                                                                                       | Horizontal<br>resolution |
|----------------------|----------------------------------|------------------------------------------------------------------------------------------------------------------------------------------------------------------------------------------------|--------------------------|
| Aqua/MODIS           | MYD04 (Level 2, Collection 6)    | Column AOD                                                                                                                                                                                     | 10 km × 10 km            |
|                      | MYD06 (Level 2, Collection 6)    | Cloud effective radius, cloud phase (determined by the “cloud optical property” algorithm), primary cloud retrieval outcome                                                                    | 1 km × 1 km              |
| CALIPSO/<br>CALIOP   | 05kmMLay (Level 2, Version 4.10) | Aerosol/cloud layer number, layer base temperature, middle layer temperature, layer top/base height, layer aerosol/cloud optical depth, feature classification flags, CAD score, extinction QC | 5 km along-track         |
|                      | 05kmAPro (Level 2, Version 4.10) | Vertically resolved pressure, relative humidity, and temperature                                                                                                                               | 5 km along-track         |
| --                   | NCEP ds083.2                     | Vertically resolved vertical velocity and wind speed; CAPE, wind shear                                                                                                                         | 1° × 1°                  |

2

3 Table S2. Correlation coefficients between various meteorological parameters.

|                          | RH <sub>100-440hPa</sub> | CAPE   | U200   | T <sub>mid</sub> |
|--------------------------|--------------------------|--------|--------|------------------|
| RH <sub>100-440hPa</sub> | --                       | 0.514  | -0.535 | -0.352           |
| CAPE                     | 0.514                    | --     | -0.623 | -0.390           |
| U200                     | -0.535                   | -0.623 | --     | 0.502            |
| T <sub>mid</sub>         | -0.352                   | -0.390 | 0.502  | --               |

4 Note:  $p < 0.01$  for all cases. RH<sub>100-440hPa</sub>, relative humidity averaged between 100 hPa and 440 hPa; CAPE,  
5 convective available potential energy; U200, U-components of wind speed at 200 hPa; T<sub>mid</sub>, middle cloud  
6 layer temperature.

7
